# Supplementary material
Source: PubMed Central journal article supplement (PMC4337071)

# 1Ca

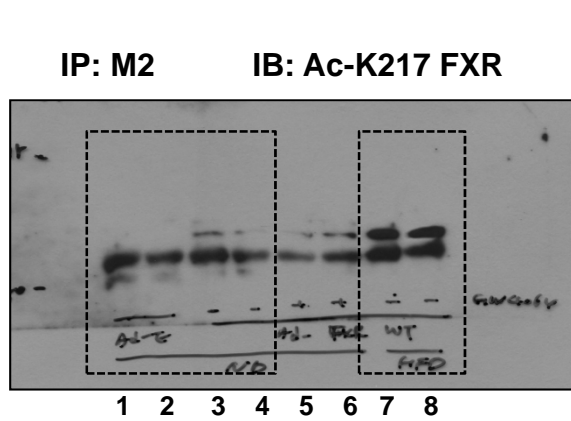

The comparison between mice fed ND and HFD is shown, but we had also analyzed samples from GW4064-treated animals and these results were deleted.

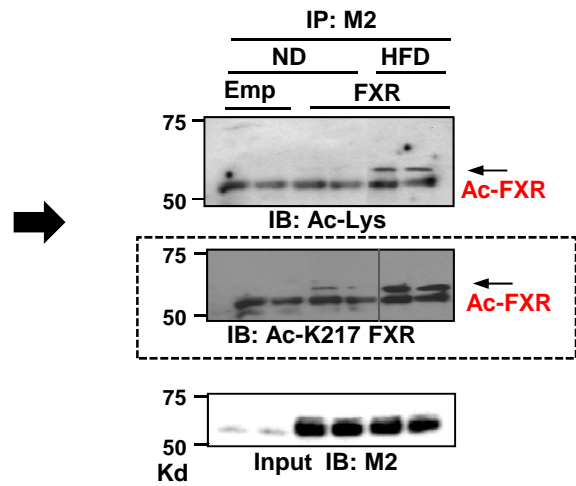

Supplement: embj0034-0184-sd3.pdf [file embj0034-0184-sd3.pdf]
