# Supplementary material
Source: PubMed Central journal article supplement (PMC4337071)
Supplement: embj0034-0184-sd4.pdf [file embj0034-0184-sd4.pdf]

# 1Cb

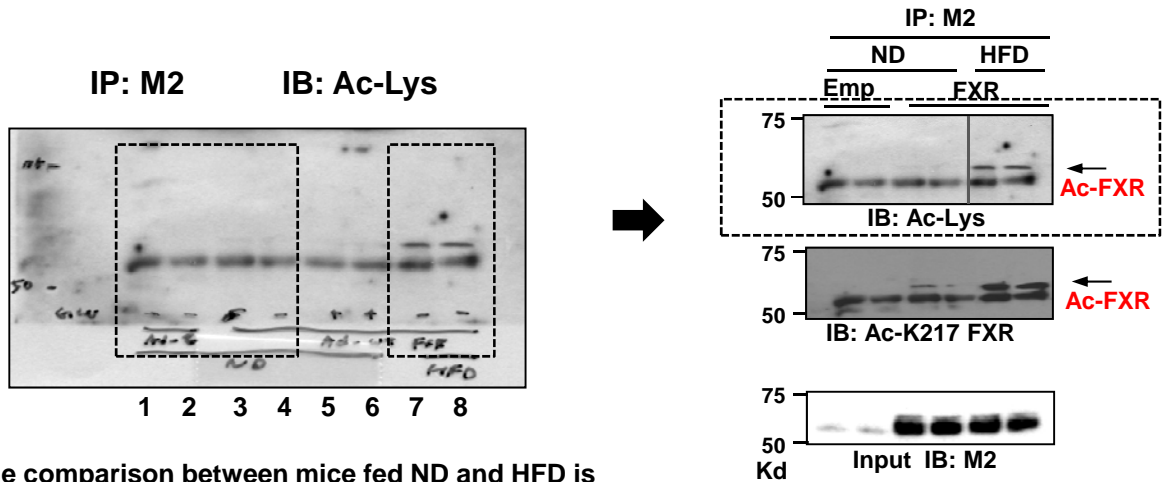

The comparison between mice fed ND and HFD is shown, but we had also analyzed samples from GW4064-treated animals and these results were deleted.
