# Supplementary material
Source: PubMed Central journal article supplement (PMC4337071)
Supplement: embj0034-0184-sd8.pdf [file embj0034-0184-sd8.pdf]

6F

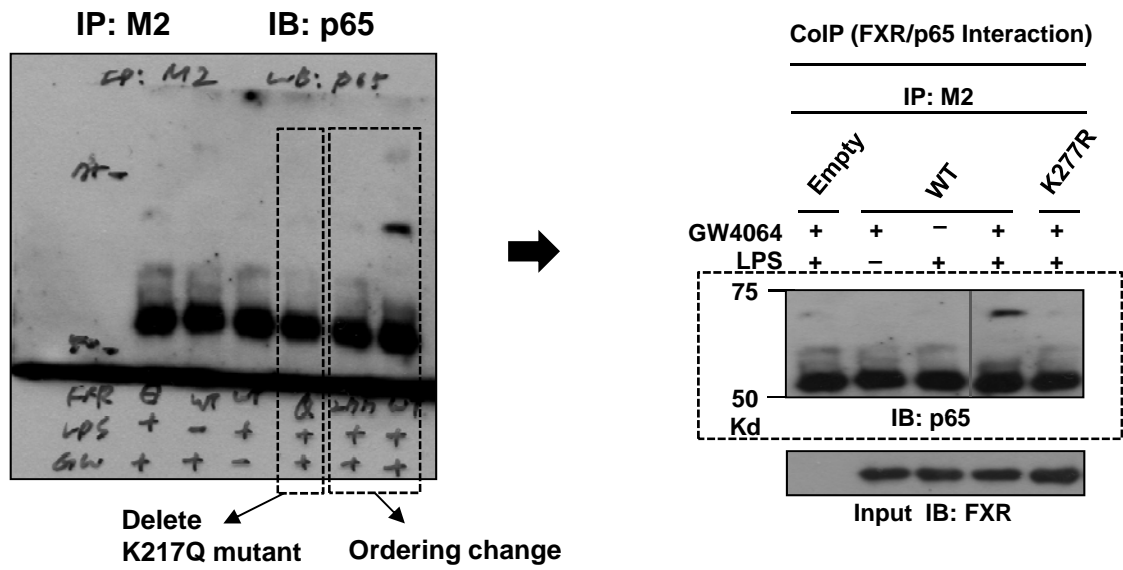

Comparison of FXR WT and K277R was presented but in the gel we had also included a K217Q lane that was not relevant and was deleted.
