# Supplementary material
Source: PubMed Central journal article supplement (PMC4337071)
Supplement: embj0034-0184-sd9.pdf [file embj0034-0184-sd9.pdf]

6H

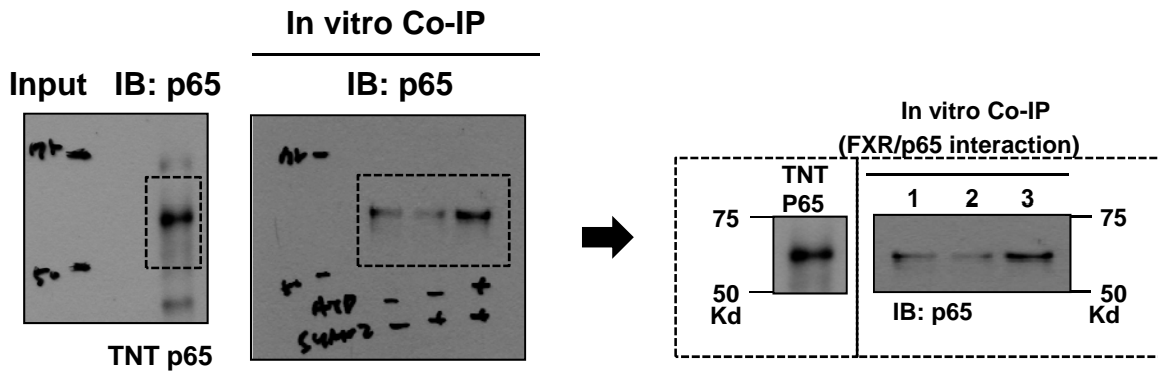

We have relabeled the first lane in this blot and clearly indicated it came from a separate gel. The intention was to show the quality of the TNT synthesized p65 and it should not have labeled input since it was analyzed separately from the CoIP experiment. It is not essential for the conclusion that interaction of the sumoylated (+ATP) FXR with p65 is increased compared to the unsumoylated FXR in the other two lanes.
