# Supplementary material
Source: PubMed Central journal article supplement (PMC4337071)
Supplement: embj0034-0184-sd10.pdf [file embj0034-0184-sd10.pdf]

# 6I

## In vitro GST pull down

### First experiment

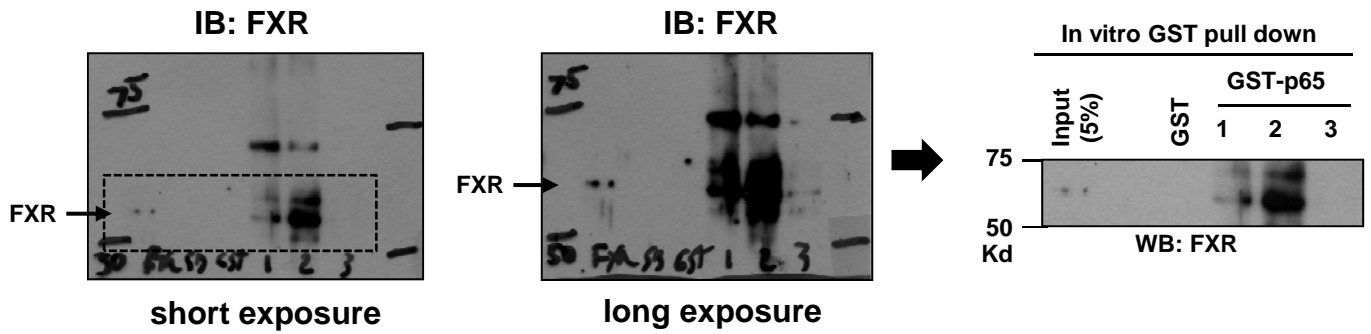

### Second experiment

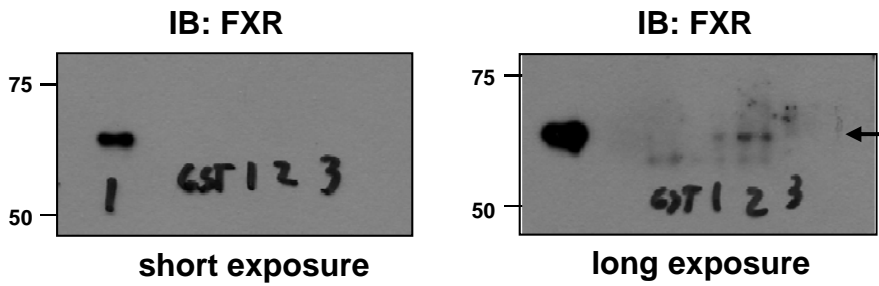

Two independent GST pull down assays were performed. We have decided to show only the data from the first experiment, since it was the cleaner gel, even though the input band is relatively weak.
