# Supplementary material
Source: PubMed Central journal article supplement (PMC4337071)

1D

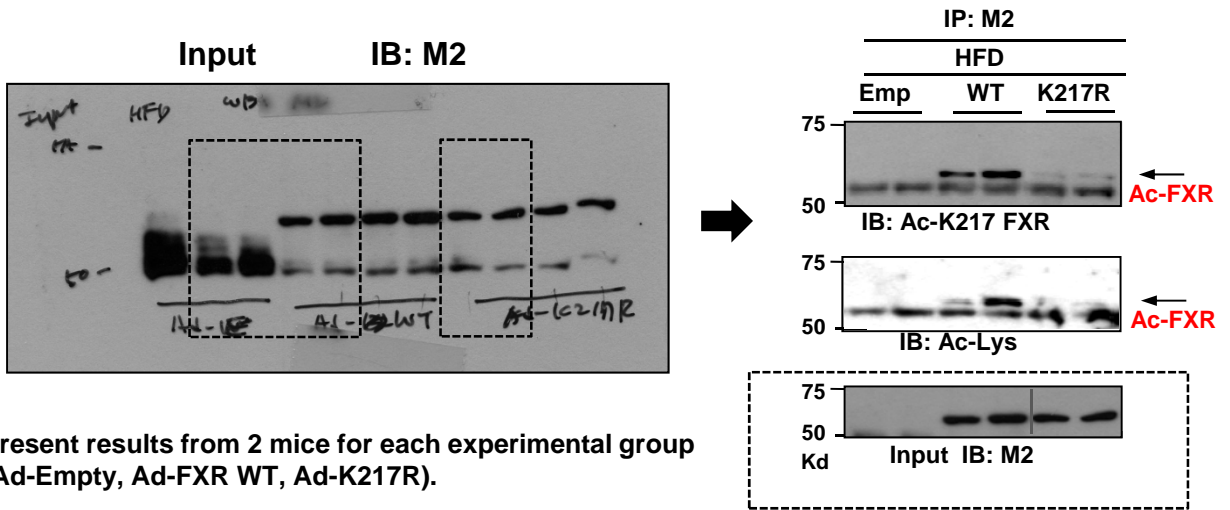

Supplement: embj0034-0184-sd5.pdf [file embj0034-0184-sd5.pdf]
